# Supplementary material
Source: Springer Nature journal article supplement (https://www.springermedizin.de/resource/supplementary/12943_2010_654_MOESM6_ESM.pdf/9554496)

## Antibody-dependent cellular cytotoxicity (ADCC)

Cetuximab

EGF

EGFR

KRas

Gene transcription

C1q

Complement-dependent cellular cytotoxicity (CDCC)

Chemotaxis and activation of immune cells

Anaphylatoxins

Complement-dependent cytotoxicity (CDC)

## Complement activation

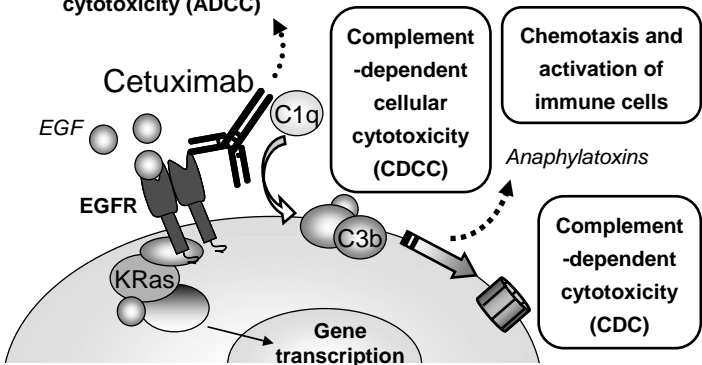

Supplement: MOESM6 [file 9554496]
